# Supplementary material for: Thermodynamics and solvation dynamics of BIV TAR RNA–Tat peptide interaction
Source: Royal Society of Chemistry journal article supplement (doi:10.1039/c2mb25357g), 2012-10-10
Supplement: c2mb25357g.pdf [file c2mb25357g.pdf]

**Supplementary information:**

**Thermodynamics and Solvation dynamics of BIV TAR RNA-Tat Peptide Interaction**

**Teena Goel<sup>1</sup>, Santosh Kumar<sup>1</sup>, and Souvik Maiti<sup>1,2\*</sup>**

**<sup>+1</sup>Proteomics and Structural Biology Unit, Institute of Genomics and Integrative Biology, CSIR, Mall Road, New Delhi 110 007, India**

**<sup>2</sup>National Chemical Laboratory, CSIR, Dr. Homi Bhabha Road, Pune 411008, India**

*\*To whom correspondence should be addressed. Phone no: +911127666156; fax +9127667471; e-mail: [souvik@igib.res.in](mailto:souvik@igib.res.in).*

**Figure S1:** Isothermal titration calorimetry (ITC) for binding of BIV Tat peptide to the BIV TAR RNA using buffer A at 20 °C and 30 °C. The top plot is the baseline corrected experimental data. The lower plot represents the molar heat released plotted against peptide to RNA molar ratio.

20 °C

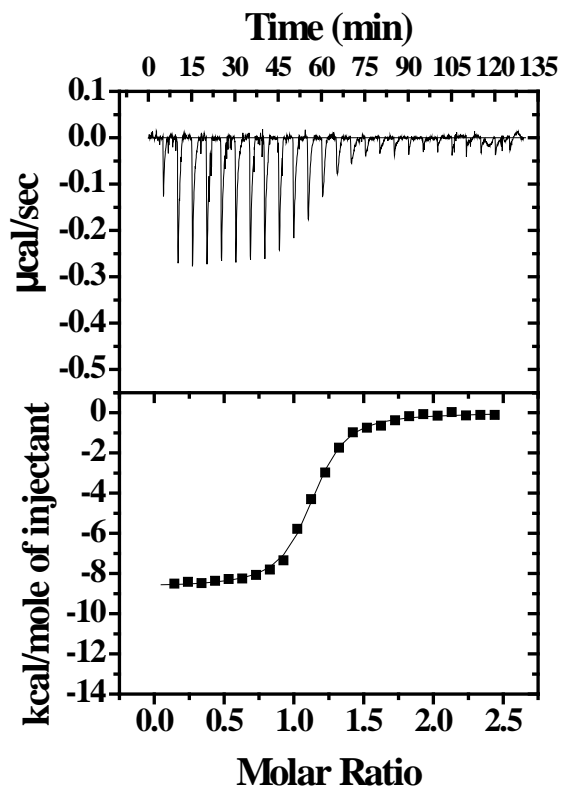

30 °C

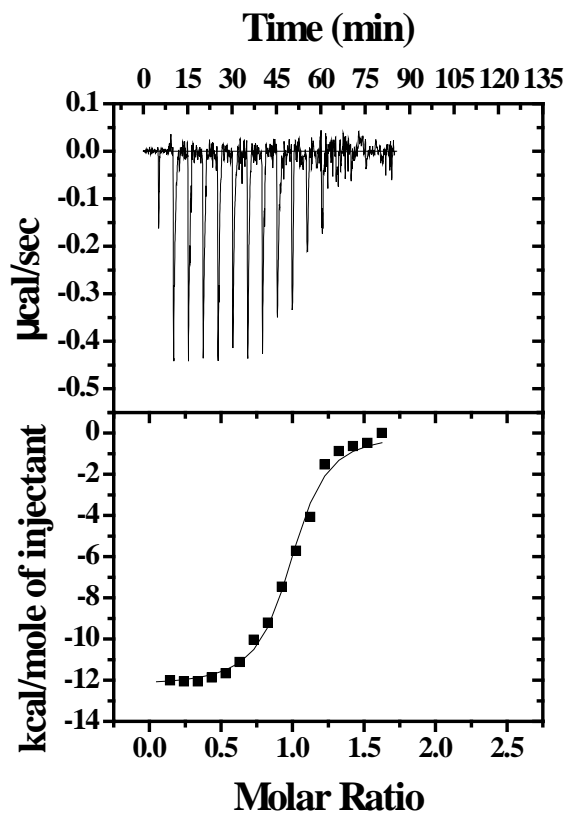

**Table S1:** Change in enthalpy and entropy as calculated from ITC experiments at different temperatures.  $n$  and  $K_a$  are the stoichiometry and binding affinity of the BIV TAR RNA-Tat system respectively.

| Temperature (°C) | $n$ | $K_a (M^{-1}) \times 10^6$ | $\Delta H$ (Kcal/mol) | $T\Delta S$ (Kcal/mol) |
|------------------|-----|----------------------------|-----------------------|------------------------|
| 30               | 0.9 | 10.6                       | -12.6                 | -2.9                   |
| 25               | 1.0 | 9.8                        | -11.7                 | -2.2                   |
| 20               | 1.1 | 1.4                        | -8.7                  | -0.5                   |

**Figure S2:** Plot of change in enthalpy of binding v/s temperature

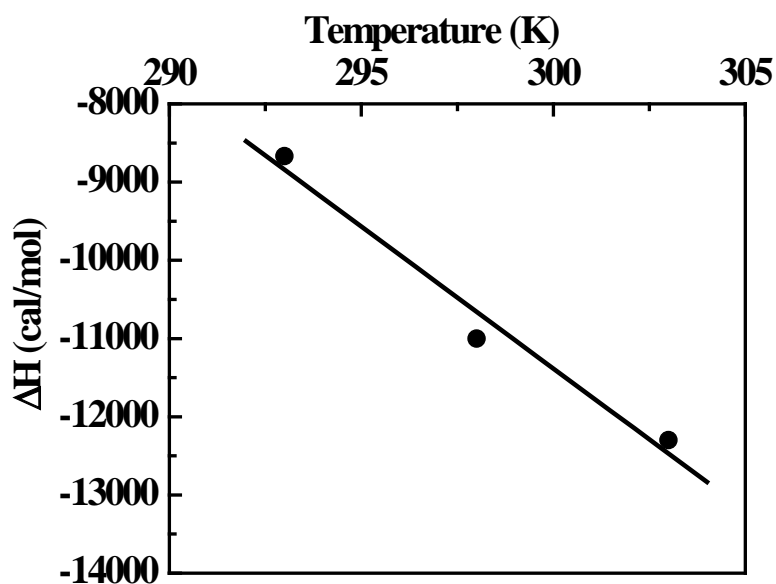

Slope of enthalpy v/s temperature is  $\Delta C_p = -363.0$  cal/mol K
